# Supplementary material for: Glucose Induces ER Stress Response-Mediated Peritoneal Mesothelial Cell Death
Source: PubMed Central journal article supplement — Acta Histochem Cytochem. 2024 Feb 23;57(1):7–14. doi: 10.1267/ahc.23-00050 (PMC10918429; doi:10.1267/ahc.23-00050), 2024-02-23
Supplement: 23-00050_1.pdf [file 23-00050_1.pdf]

## Materials and Methods

### Rat treated with icodextrine

Eight-week-old male Wistar rats were instilled intraperitoneally twice a day for 8 weeks with 20 ml of icodextrine PD fluid (Extraneal<sup>®</sup>, Baxter Healthcare, Tokyo, Japan). The animals were anesthetized by intraperitoneal injection of a mixture of medetomidine, midazolam, and butorphanol, followed by dissection of intact peritoneal tissues for morphological analysis. The research protocol was approved by the Ethics Committee of the University of Occupational and Environmental Health and was carried out in accordance with the University of Occupational and Environmental Health Animal Experimentation Regulation (institutional review board approval number AE-20-010).

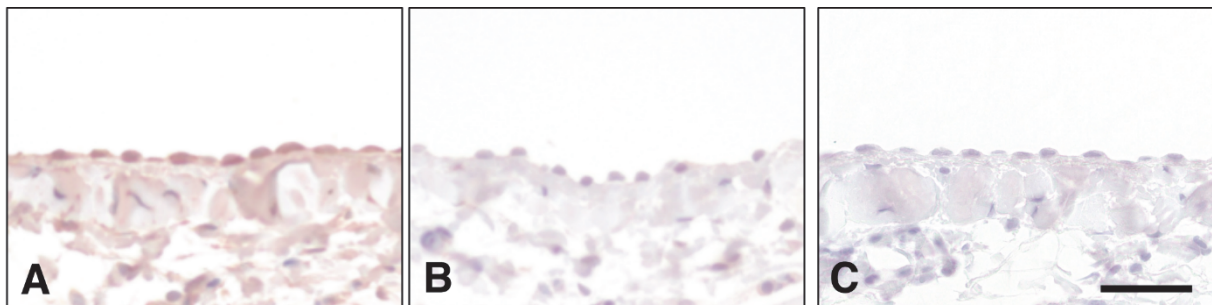

### Supplementary Fig. 1.

Eukaryotic translation initiation factor-2 $\alpha$  (eIF-2 $\alpha$ ) expression in rat peritoneum. Immunohistochemical analyses were performed on sections of icodextrine-containing peritoneal dialysis fluid-treated rat peritoneum. Sections were analyzed by immunohistochemistry using antibodies against eIF-2 $\alpha$  (A) or phospho-eIF-2 $\alpha$  (B). For negative control, the primary antibodies replaced with 1% BSA-PBA (C). Bars = 40  $\mu$ m.
